# Supplementary material
Source: publisher figshare collection journal article supplement (https://frontiersin.figshare.com/ndownloader/files/28217775)
Supplement: Supplementary file [file 28217775]

**A**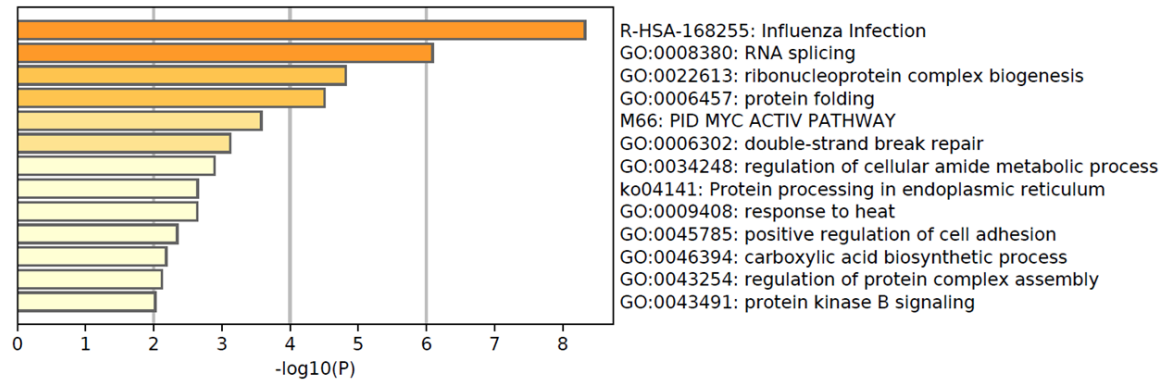**B**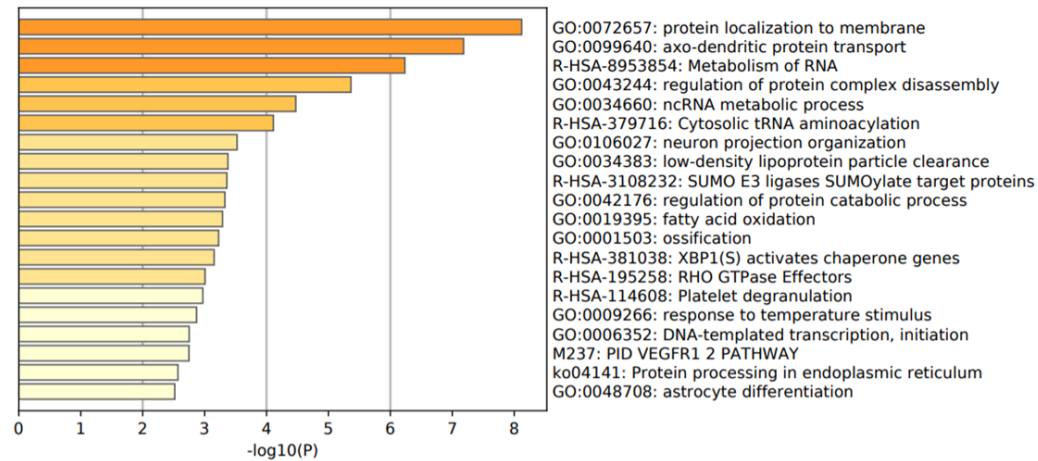**C**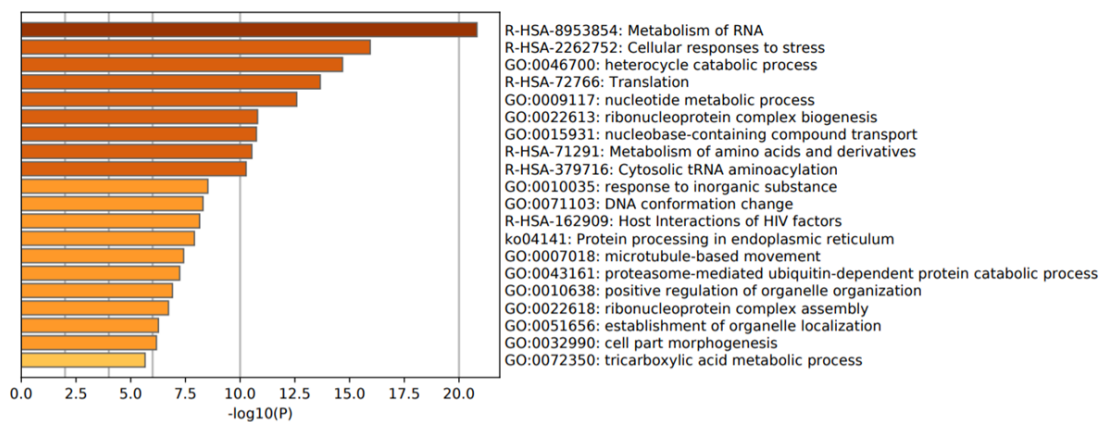

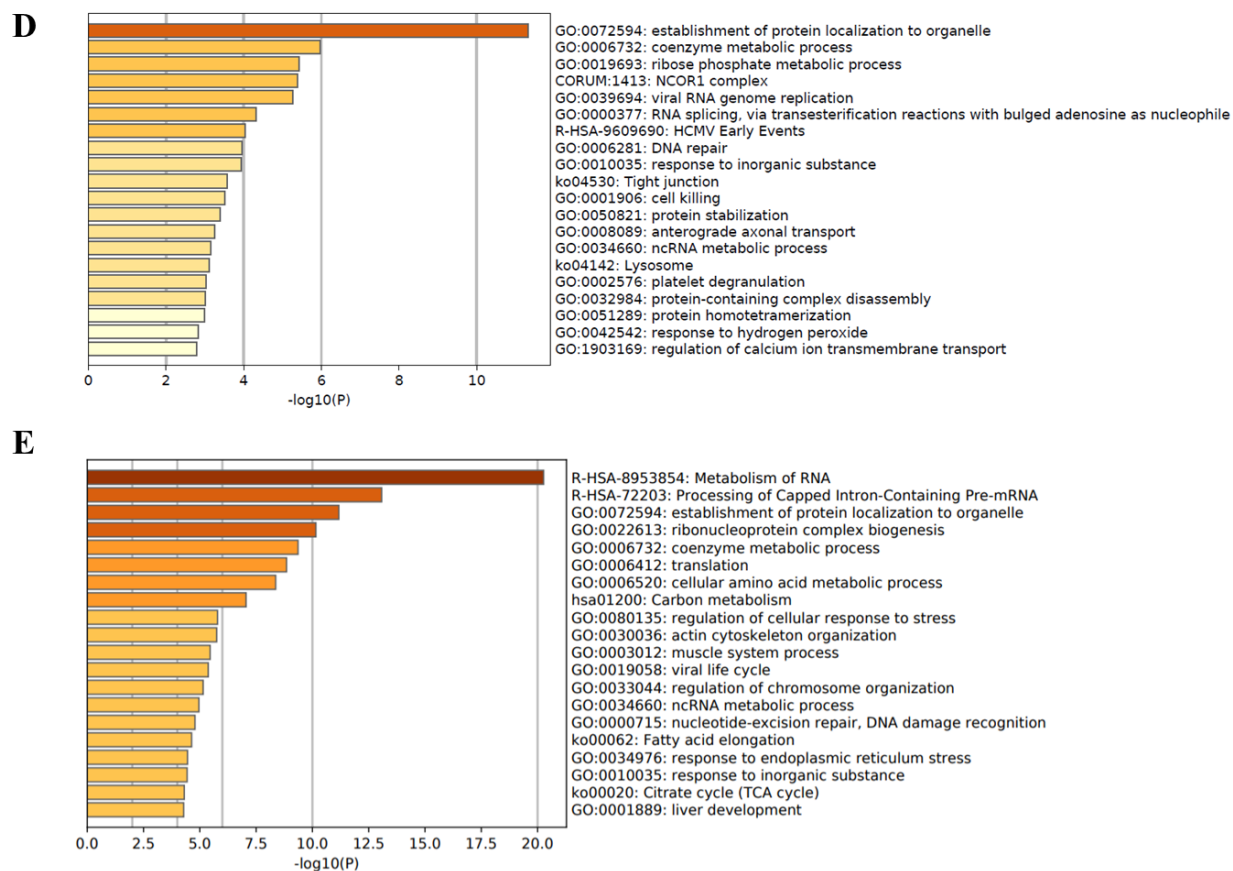

**Figure S2.** Bar graph of enriched biochemical pathways in MO3.13 cells treated with cuprizone (10 $\mu$ M, 48h, A), haloperidol (B), clozapine (C), cannabidiol (D) and benztropine (E), colored by p-value, created in Metascape. Colored lines represent p-values, which range between 10<sup>-20</sup> to 10<sup>-2</sup>.
